# Supplementary material for: Establishment of a Simple and Efficient Reverse Genetics System for Canine Adenoviruses Using Bacterial Artificial Chromosomes
Source: PubMed Central journal article supplement (PMC7412426; doi:10.3390/v12070767), 2020-07-16
Supplement: viruses-12-00767-s001.pdf [file viruses-12-00767-s001.pdf]

## **Supplementary Information**

### **Establishment of a simple and efficient reverse genetics system for canine adenoviruses using bacterial artificial chromosomes**

Hikomichi Matsugo, Tomoya Kobayashi-Kitamura, Haruhiko Kamiki, Hiroho Ishida, Akiko Takenaka-Uema,  
Shin Murakami and Taisuke Horimoto

**Table S1.** Primers used in this study

| Primer             | Sequence (5' – 3')                                                      | Sequence capitalized                     |
|--------------------|-------------------------------------------------------------------------|------------------------------------------|
| pUC19-GalK F       | gacgTCTAGAcctgttgacaattaatcatc                                          | restriction enzyme site                  |
| Kn-Galk R          | ccatcttgttcaatcatGTACAGCCTCCTcagcactgtcctgctccttg                       | Shine-Dalgarno (SD) sequence             |
| GalK Kn F          | AGGAGGCTGTACatgattgaacaagatggattg                                       | Shine-Dalgarno (SD) sequence             |
| pUC19-Kn R         | ggtcAAGCTTcagaagaactcgtcaagaag                                          | restriction enzyme site                  |
| CAdV1-ITR-GalK F1  | GGACAAAGAGGTGTGGCCTAAATGTTGTTTTcctgttgacaattaatcatcg                    | inverted terminal repeats (ITR) sequence |
| CAdV1-ITR-GalK R1  | GGACAAAGAGGTGTGGCCTAAATGTTGTTTTtcagcactgtcctgctccttg                    | inverted terminal repeats (ITR) sequence |
| CAdV2-ITR-GalK F1  | GGACAAAGAGGTGTGGCTTAAATTTGGGCGTTcctgttgacaattaatcatcg                   | inverted terminal repeats (ITR) sequence |
| CAdV2-ITR-GalK R1  | GGACAAAGAGGTGTGGCTTAAATTTGGGCGTTtcagcactgtcctgctccttg                   | inverted terminal repeats (ITR) sequence |
| CAdV1-ITR FR2      | atctGGATCCTTAATTAACGATCGcatcatcaataatatacaggacaaagaggtgtggcctaaatgttg   | restriction enzyme sites                 |
| CAdV2-ITR FR2      | atctGGATCCGCGGCCGCGATCGcatcatcaataatatacaggacaaagaggtgtggcctaaatgttg    | restriction enzyme sites                 |
| SL1                | cagtccagttacgctggagtc                                                   |                                          |
| SMART BAC 159R     | aacctcttacgtccgatcag                                                    |                                          |
| CAdV1 259R         | gctccaaggctagaacaataaacc                                                |                                          |
| CAdV2 300R         | acattaggcgtggaggaactg                                                   |                                          |
| CAdV1 30090F       | gtctgtgagctccagatgag                                                    |                                          |
| CAdV2 30880F       | agaggagagctatgaggatg                                                    |                                          |
| CAdV2-E1-GalK-Kn F | GGTTTTTCGCCACGCCCTTTGGGTAAATTTATTTCCCTATACGCGGCCTTcctgttgacaattaatcatcg | homologous sequence                      |
| CAdV2-E1-GalK-Kn R | ATTCTCTGCACAACCCCCCGAGGGGCTGCAATTACACACATTGACAAAGTcagaagaactcgtcaagaagg | homologous sequence                      |
| Venus cassette F   | ATTCTCTGCACAACCCCCCGAGGGGCTGCAATTACACACATTGACAAAGTgacattgattattgactag   | homologous sequence                      |
| Venus cassette R   | GGTTTTTCGCCACGCCCTTTGGGTAAATTTATTTCCCTATACGCGGCCTTccatagagcccaccgcatcc  | homologous sequence                      |
| cGAPDH F           | cgatggtgaaggtcggagtg                                                    |                                          |
| cGAPDH R           | actggaacatgtacacatgtagtt                                                |                                          |
| CAdV2-E1A F        | agagctactggaagagtggc                                                    |                                          |
| CAdV2-E1A R        | ttctgtttgctcaggctctg                                                    |                                          |
| CAdV2-E1B F        | cactttagaatgccagag                                                      |                                          |
| CAdV2-E1B R        | ctttcactaatgaacacac                                                     |                                          |
| CAdV2-hexon F      | tacatgaatgtagattacc                                                     |                                          |
| CAdV2-hexon R      | ggttgatgctctgaatgttg                                                    |                                          |
